# Supplementary material for: Antioxidant Therapy Reduces Oxidative Stress, Restores Na,K-ATPase Function and Induces Neuroprotection in Rodent Models of Seizure and Epilepsy: A Systematic Review and Meta-Analysis
Source: MDPI journal article supplement (doi:10.3390/antiox12071397), 2023-07-07
Supplement: s1 [file s1]

## Supplementary Data N°1: Risk of bias assessment

Selection Bias – Q1: Sequence of Allocation: Does the study indicate that the control, epileptic, and epileptic/antioxidant groups were randomly allocated? Q2: Baseline Characteristics: Are sex, age, and weight of the animals similar between the groups? Q3: Allocation concealment: Was the induction of epilepsy blinded; that is, was there allocation concealment of epileptic animals at the time of induction?

Performance Bias - Q4: Random housing: Does the article describe whether the control, epileptic, and epileptic/antioxidant groups were randomly distributed among housing exposed to the same conditions: same vivarium in standardized boxes, light/dark cycle, temperature, and feeding? Q5: Blinding: Does the study describe whether the investigator was aware of which animals received each type of intervention (saline or antioxidant) during the study?

Detection bias: Q6, Randomized outcome assessment: Does the study describe whether the outcome assessment of the groups was performed randomly? Q7: Blinding of the outcome assessor: Was the investigator aware of which animals had received each type of intervention (saline or antioxidant) in the outcome assessment?

Attrition Bias – Q8: Incomplete outcome: did the study exclude animals in the outcome assessment?

Information Bias Q9: Selective outcome reporting: Was there selective reporting of outcomes in the study when comparing the methodology and results sections?

Other sources of bias Q10: Was there an evaluation of epileptic seizures after induction in animals?

Supplementary Data N° 2: The brain area under study and the outcome assessed.

| Outcomes                  | Brain part  | Articles                                                                                                                           |
|---------------------------|-------------|------------------------------------------------------------------------------------------------------------------------------------|
| reactive species          | Whole Brain | *Wilhelm et al., 2009<br>*Wilhelm et al., 2010                                                                                     |
| reactive species          | hippocampus | *Bortolatto et al., 2011<br>Vogt et al., 2022                                                                                      |
| reactive species          | Cortex      | *Bortolatto et al., 2011<br>Vogt et al., 2022                                                                                      |
| protein carbonyl          | hippocampus | Rambo et al., 2009<br>*Bortolatto et al., 2011                                                                                     |
| protein carbonyl          | Cortex      | *Bortolatto et al., 2011<br>*Della-Pace et al., 2013<br>Rambo et al., 2013                                                         |
| protein carbonyl          | Striatum    | *Oliveira et al., 2004<br>*Figuera et al., 2006                                                                                    |
| Nitric oxide              | Whole Brain | Kandhare et al., 2018<br>Zhang et al., 2019<br>*Tao et al., 2020<br>Wang et al., 2021                                              |
| Nitric oxide              | hippocampus | Ezz et al., 2011<br>Ahmed, 2014<br>Alkhudhary et al., 2022                                                                         |
| malondialdehyde           | Whole Brain | *Wilhelm et al., 2010<br>Kandhare et al., 2018<br>Zhang et al., 2019<br>*Tao et al., 2020<br>Wang et al., 2021<br>Gad et al., 2022 |
| malondialdehyde           | hippocampus | Rambo et al., 2009<br>Ezz et al., 2011<br>Ahmed, 2014<br>Abd Allah et al., 2021<br>Vogt et al., 2022<br>Alkhudhary et al., 2022    |
| malondialdehyde           | Cortex      | *Souza et al., 2013<br>*Della-Pace et al., 2013<br>Rambo et al., 2013<br>Vogt et al., 2022                                         |
| malondialdehyde           | Striatum    | *Figuera et al., 2006                                                                                                              |
| glutathione S-transferase | Whole Brain | *Wilhelm et al., 2009<br>*Wilhelm et al., 2010                                                                                     |
| glutathione peroxidase    | Whole Brain | *Wilhelm et al., 2009<br>*Wilhelm et al., 2010                                                                                     |
| glutathione peroxidase    | hippocampus | Freitas 2010<br>*Bortolatto et al., 2011<br>Alkhudhary et al., 2022                                                                |
| glutathione peroxidase    | Cortex      | *Bortolatto et al., 2011                                                                                                           |
| glutathione reductase     | Whole Brain | Gad et al., 2022                                                                                                                   |

|                       |             |                                                                                                                                                                                                                          |
|-----------------------|-------------|--------------------------------------------------------------------------------------------------------------------------------------------------------------------------------------------------------------------------|
| glutathione reductase | hippocampus | Freitas 2010<br>Alkhudhary et al., 2022                                                                                                                                                                                  |
| reduced glutathione   | Whole Brain | Kandhare et al., 2018<br>Zhang et al., 2019<br>*Tao et al., 2020<br>Wang et al., 2021                                                                                                                                    |
| reduced glutathione   | hippocampus | Freitas 2010<br>Ezz et al., 2011<br>Ahmed, 2014<br>Alkhudhary et al., 2022                                                                                                                                               |
| reduced glutathione   | Cortex      | *Souza et al., 2013                                                                                                                                                                                                      |
| superoxide dismutase  | Whole Brain | *Wilhelm et al., 2009<br>Kandhare et al., 2018<br>Zhang et al., 2019<br>*Tao et al., 2020<br>Wang et al., 2021<br>Gad et al., 2022                                                                                       |
| superoxide dismutase  | hippocampus | Rambo et al., 2009<br>Abd Allah et al., 2021<br>Vogt et al., 2022b<br>Alkhudhary et al., 2022                                                                                                                            |
| superoxide dismutase  | Cortex      | Vogt et al., 2022a                                                                                                                                                                                                       |
| catalase              | Whole Brain | *Wilhelm et al., 2009<br>*Wilhelm et al., 2010<br>Gad et al., 2022                                                                                                                                                       |
| catalase              | hippocampus | Rambo et al., 2009<br>Ezz et al., 2011<br>Ahmed, 2014<br>Abd Allah et al., 2021<br>Alkhudhary et al., 2022                                                                                                               |
| Na,K-ATPase           | Whole Brain | *Wilhelm et al., 2009<br>*Wilhelm et al., 2010<br>Kandhare et al., 2018<br>Zhang et al., 2019<br>*Tao et al., 2020<br>Wang et al., 2021<br>Gad et al., 2022                                                              |
| Na,K-ATPase           | hippocampus | Rambo et al., 2009<br>Freitas 2010<br>Santos et al., 2010<br>Ezz et al., 2011<br>*Bortolatto et al., 2011<br>Ahmed, 2014<br>Pires et al., 2015<br>Abd Allah et al., 2021<br>Vogt et al., 2022<br>Alkhudhary et al., 2022 |
|                       | Cortex      | Santos et al., 2010<br>*Bortolatto et al., 2011<br>*Souza et al., 2013                                                                                                                                                   |

|             |            |                                                                       |
|-------------|------------|-----------------------------------------------------------------------|
| Na,K-ATPase |            | *Della-Pace et al., 2013<br>Rambo et al., 2013<br>Vogt et al., 2022   |
| Na,K-ATPase | Striatum   | Oliveira et al., 2004<br>*Figuera et al., 2006<br>Santos et al., 2010 |
| Na,K-ATPase | cerebellum | Santos et al., 2010                                                   |

Note: The data regarding GSH levels from the study by Abd Allah et al. (2021) were excluded due to data inconsistency because the figure had different information compared to the discussion in the article. The author admitted that there was an error in figure 3B and did not make the data available by email [20, 51-71].

\* Articles included only in the systematic review.
